# Supplementary material
Source: Springer Nature journal article supplement (http://www.springermedizin.de/resource/supplementary/12958_2009_501_MOESM5_ESM.pdf/9568156)

A

| <i>Af</i> | <i>Am</i> | <i>As</i> | <i>Mm</i> |           |
|-----------|-----------|-----------|-----------|-----------|
| 91.7      | 92.3      | 90.4      | 86.3      | <i>Aa</i> |
|           | 98.8      | 98.5      | 85.9      | <i>Af</i> |
|           |           | 98.4      | 86.6      | <i>Am</i> |
|           |           |           | 84.9      | <i>As</i> |

B

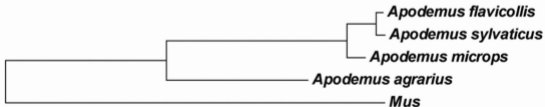

0.02

Supplement: MOESM5 [file 9568156]
